# Supplementary material
Source: PubMed Central journal article supplement (PMC4345440)
Supplement: rspb20142471supp1.pdf [file rspb20142471supp1.pdf]

1 **ELECTRONIC SUPPLEMENTARY MATERIAL**

2 **Supplementary figure**

3 Figure S1. Schematic of experimental design. 1. Single bees in vials (Experiment #1) or  
4 trios of bees in microcolony containers (Experiment #2) were fed *ad libitum* 30% sucrose  
5 solution and pollen for two days. 2. On day three, we inoculated all bees in Experiment  
6 #1 and two of four treatment groups of bees in Experiment #2 with *Crithidia bombi*. 3.  
7 We then began experimental nectar treatments, a 30% sucrose solution with or without  
8 one of eight secondary metabolite compounds for single bees, or control vs. anabasine for  
9 microcolonies. 4. We assessed parasite load and survival on day nine for single bee  
10 experiments. 5. We assessed parasite load, survival and reproduction after day 28 for the  
11 microcolony experiment.

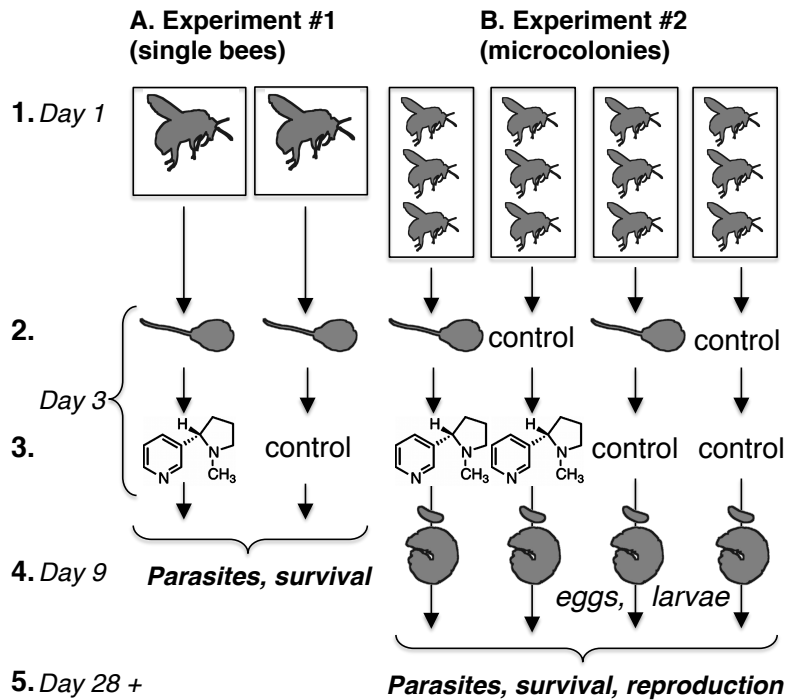

13 **Supplementary tables**

14 Table S1. Experiment 1: Effects of eight secondary metabolites and experimental  
 15 covariates on *Crithidia bombi* cell density in the intestines of the host *Bombus impatiens*.  
 16 An AIC selection procedure was used to select best-fit ANCOVA models for each  
 17 analysis. For main effects, Cohen's *d* effect sizes were calculated from model least square  
 18 means and error terms. Statistically significant differences are indicated in bold.

19

| Compounds                    | Main Effects                                          |      |      |       |              |                     | Covariates                                                                                                                                                                                                                |
|------------------------------|-------------------------------------------------------|------|------|-------|--------------|---------------------|---------------------------------------------------------------------------------------------------------------------------------------------------------------------------------------------------------------------------|
|                              | Mean (Log <sub>10</sub><br>(cells*mL <sup>-1</sup> )) | SE   | SS   | F     | P            | Cohen's<br><i>d</i> |                                                                                                                                                                                                                           |
| <i>Alkaloids</i>             |                                                       |      |      |       |              |                     |                                                                                                                                                                                                                           |
| Anabasine                    | 5.33                                                  | 0.18 | 3.90 | 13.77 | <b>0.001</b> | -1.36               | Colony F <sub>1,26</sub> = 6.22, <b>P = 0.02</b>                                                                                                                                                                          |
| Control                      | 6.05                                                  | 0.15 |      |       |              |                     | Inoculum F <sub>1,26</sub> = 2.43, <b>P = 0.05</b><br>Radial Cell (mm) F <sub>1,26</sub> = 2.43, P = 0.13                                                                                                                 |
| Caffeine                     | 6.12                                                  | 0.23 | 0.32 | 0.50  | 0.49         | -0.37               | Colony F <sub>1,21</sub> = 1.32, P = 0.29                                                                                                                                                                                 |
| Control                      | 6.42                                                  | 0.33 |      |       |              |                     | Radial Cell (mm) F <sub>1,21</sub> = 2.32, P = 0.14<br>Weight (g) F <sub>1,21</sub> = 1.01, P = 0.33                                                                                                                      |
| Nicotine                     | 6.48                                                  | 0.14 | 1.41 | 7.67  | <b>0.01</b>  | -0.97               | Colony F <sub>1,29</sub> = 3.78, <b>P = 0.01</b>                                                                                                                                                                          |
| Control                      | 6.89                                                  | 0.12 |      |       |              |                     | Radial Cell (mm) F <sub>1,29</sub> = 4.80, <b>P = 0.04</b><br>Weight (g) F <sub>1,29</sub> = 1.26, P = 0.27                                                                                                               |
| <i>Cyanogenic Glycosides</i> |                                                       |      |      |       |              |                     |                                                                                                                                                                                                                           |
| Amygdalin                    | 6.00                                                  | 0.17 | 0.11 | 0.19  | 0.67         | -0.11               | Colony F <sub>1,53</sub> = 1.05, P = 0.42                                                                                                                                                                                 |
| Control                      | 6.08                                                  | 0.18 |      |       |              |                     | Experimental Trial F <sub>1,53</sub> = 3.78, P = 0.06<br>Exp. Trial* Treatment F <sub>1,53</sub> = 0.80, P = 0.37<br>Radial Cell (mm) F <sub>1,53</sub> = 1.16, P = 0.29<br>Weight (g) F <sub>1,53</sub> = 0.06, P = 0.80 |
| <i>Iridoid Glycosides</i>    |                                                       |      |      |       |              |                     |                                                                                                                                                                                                                           |

|                   |      |      |      |      |             |       |                     |                                       |
|-------------------|------|------|------|------|-------------|-------|---------------------|---------------------------------------|
| Aucubin           | 5.98 | 0.19 | 0.57 | 2.15 | 0.15        | -0.63 | Colony              | $F_{1,44} = 1.38, P = 0.25$           |
| Control           | 6.30 | 0.22 |      |      |             |       | Radial Cell<br>(mm) | $F_{1,44} = 1.05, P = 0.31$           |
|                   |      |      |      |      |             |       | Weight (g)          | $F_{1,44} = 1.40, P = 0.24$           |
| Catalpol          | 5.89 | 0.18 | 1.03 | 3.89 | <b>0.05</b> | -0.80 | Colony              | $F_{1,44} = 1.38, P = 0.25$           |
| Control           | 6.30 | 0.22 |      |      |             |       | Radial Cell<br>(mm) | $F_{1,44} = 1.05, P = 0.31$           |
|                   |      |      |      |      |             |       | Weight (g)          | $F_{1,44} = 1.40, P = 0.24$           |
| <i>Phenolics</i>  |      |      |      |      |             |       |                     |                                       |
| Gallic Acid       | 6.47 | 0.16 | 0.48 | 1.38 | 0.25        | -0.36 | Colony              | $F_{1,38} = 2.95, P = \mathbf{0.01}$  |
| Control           | 6.68 | 0.16 |      |      |             |       | Radial Cell<br>(mm) | $F_{1,38} = 1.94, P = 0.17$           |
|                   |      |      |      |      |             |       | Weight (g)          | $F_{1,38} = 2.19, P = 0.15$           |
| <i>Terpenoids</i> |      |      |      |      |             |       |                     |                                       |
| Thymol            | 5.87 | 0.15 | 2.29 | 7.89 | <b>0.01</b> | -0.90 | Colony              | $F_{1,38} = 0.91, P = 0.35$           |
| Control           | 6.36 | 0.14 |      |      |             |       | Inoculum            | $F_{1,38} = 8.86, P = \mathbf{0.001}$ |
|                   |      |      |      |      |             |       | Radial Cell<br>(mm) | $F_{1,38} = 0.52, P = 0.48$           |
|                   |      |      |      |      |             |       | Weight (g)          | $F_{1,38} = 0.18, P = 0.67$           |

21 Table S2. Experiment 2: Mixed effects models for response variables from anabasine  
 22 microcolony experiment, including A) bee *Crithidia* load, B) daily consumption of  
 23 nectar, C) daily consumption of pollen, and D) number of days to first egg production. F-  
 24 statistics and P-values are given for each fixed effect, and statistically significant results  
 25 ( $P \leq 0.05$ ) are indicated in bold.

26

| Analysis             | Effect                        | Statistic                                     |
|----------------------|-------------------------------|-----------------------------------------------|
| A) Parasite count    | Nectar treatment              | $F_{1, 7.0} = 9.58$ , <b>P = 0.02</b>         |
|                      | Day                           | $F_{1, 6.8} = 10.45$ , <b>P = 0.01</b>        |
|                      | Dimorphism                    | $F_{1, 8.0} = 8.39$ , <b>P = 0.02</b>         |
|                      | Nectar treatment*Dimorphism   | $F_{1, 7.6} = 6.43$ , <b>P = 0.04</b>         |
| B) Nectar            | Nectar treatment              | $F_{1, 65.3} = 5.16$ , <b>P = 0.03</b>        |
|                      | Parasite treatment            | $F_{1, 43.2} = 2.80$ , P = 0.10               |
|                      | Day                           | $F_{1, 830.4} = 41.79$ , <b>P &lt; 0.0001</b> |
|                      | Nectar*Day                    | $F_{1, 869.0} = 1.19$ , P = 0.28              |
|                      | Nectar*Parasite               | $F_{1, 32.3} = 0.21$ , P = 0.65               |
|                      | Parasite*Day                  | $F_{1, 877.5} = 0.78$ , P = 0.38              |
|                      | Number of bees in microcolony | $F_{1, 605.5} = 70.09$ , <b>P &lt; 0.0001</b> |
| C) Pollen            | Nectar treatment              | $F_{1, 43.7} = 2.20$ , P = 0.15               |
|                      | Parasite treatment            | $F_{1, 43.6} = 5.98$ , <b>P = 0.02</b>        |
|                      | Day                           | $F_{1, 786.7} = 44.12$ , <b>P &lt; 0.0001</b> |
|                      | Nectar*Day                    | $F_{1, 777.2} = 0.15$ , P = 0.70              |
|                      | Nectar*Parasite               | $F_{1, 43.7} = 0.82$ , P = 0.37               |
|                      | Parasite*Day                  | $F_{1, 787.8} = 0.12$ , P = 0.73              |
|                      | Number of bees in microcolony | $F_{1, 288.1} = 4.34$ , <b>P = 0.04</b>       |
| D) Days to first egg | Nectar treatment              | $F_{1, 28.2} = 4.26$ , <b>P = 0.05</b>        |
|                      | Parasite treatment            | $F_{1, 29.1} = 0.03$ , P = 0.87               |
|                      | Nectar*Parasite               | $F_{1, 29.5} = 0.13$ , P = 0.72               |

27

28

29 Table S3. Experiment 2: Random effects statistics for mixed model analysis of A) bee  
 30 *Crithidia* load, B) daily consumption of nectar, C) daily consumption of pollen, and D)  
 31 number of days to first egg production.

32

| Analysis             | Random effect       | Variance ratio | Variance component | Standard error | Percent of total |
|----------------------|---------------------|----------------|--------------------|----------------|------------------|
| A) Parasite count    | Microcolony         | 0.20           | 0.02               | 0.03           | 16.9             |
|                      | Residual            |                | 0.08               | 0.03           | 83.1             |
|                      | Total               |                | 0.10               | 0.03           | 100.0            |
| B) Nectar            | Source Colony       | 0.15           | 0.01               | 0.01           | 11.6             |
|                      | Microcolony/ nectar | 0.11           | 0.01               | 67,841.13      | 9.0              |
|                      | Microcolony/ pollen | -0.03          | 0.00               | 67,841.13      | 0.0              |
|                      | Residual            |                | 0.06               | 0.00           | 79.5             |
|                      | Total               |                | 0.08               | 67,841.13      | 100.0            |
| C) Pollen            | Source Colony       | 0.01           | 0.00               | 0.00           | 1.2              |
|                      | Microcolony/ nectar | 0.16           | 0.03               | 104,184.27     | 13.8             |
|                      | Microcolony/ pollen | -0.14          | -0.02              | 104,184.27     | 0.0              |
|                      | Residual            |                | 0.17               | 0.01           | 85.1             |
|                      | Total               |                | 0.20               | 104,184.27     | 100.0            |
| D) Days to first egg | Source colony       | 1.08           | 8.11               | 5.65           | 52.0             |
|                      | Residual            |                | 7.50               | 2.03           | 48.0             |
|                      | Total               |                | 15.60              | 5.95           | 100.0            |

33

34 Table S4. Experiment 2: Likelihood ratio tests for penalized and full models from a  
 35 proportional hazards model of anabasine microcolony bee survival including both fixed  
 36 and random effects. Data are Chi-squared values, degrees of freedom, P-values, Akaike  
 37 Information Criterion (AIC) and Bayesian Information Criterion (BIC). Statistically  
 38 significant results ( $P \leq 0.05$ ) are indicated in bold.

39

| Likelihood ratio test     | $\chi^2$ | df    | P                                       | AIC   | BIC   |
|---------------------------|----------|-------|-----------------------------------------|-------|-------|
| Integrated log-likelihood | 41.2     | 4.00  | <b><math>2.47 \cdot 10^{-8}</math></b>  | 33.18 | 28.3  |
| Penalized log-likelihood  | 104.05   | 22.13 | <b><math>1.39 \cdot 10^{-12}</math></b> | 59.79 | 32.82 |

40

41 Table S5. Experiment 2: Effect of nectar diet (anabasine vs. control) and parasite  
 42 infection on the probability of mortality of bees in the anabasine microcolony  
 43 experiment. Negative coefficients indicate reduced probability of mortality in the  
 44 treatment group listed. Statistically significant results ( $P \leq 0.05$ ) are indicated in bold.  
 45

| Fixed effects                 | Coefficient | $e^{\text{coefficient}}$ | Coefficient standard error | Z-score | P            |
|-------------------------------|-------------|--------------------------|----------------------------|---------|--------------|
| Nectar treatment (control)    | 0.088       | 1.092                    | 0.998                      | 0.090   | 0.930        |
| <i>Crithidia</i> (uninfected) | -2.043      | 0.130                    | 1.036                      | -1.970  | <b>0.048</b> |

46

47 Table S6. Experiment 2: Variance explained by two random effects, microcolony and colony of  
48 origin, in the proportional hazards model of bee survival in the anabasine microcolony  
49 experiment.

50

| Random effects   | Variable  | Standard deviation | Variance |
|------------------|-----------|--------------------|----------|
| Microcolony      | Intercept | 2.32               | 5.38     |
| Colony of origin | Intercept | 2.89               | 8.38     |

51
